# Supplementary material for: Sex Differences in Outcomes of Patients with an Implantable Cardioverter-Defibrillator for the Secondary Prevention of Sudden Cardiac Death
Source: MDPI journal article supplement (doi:10.3390/jcdd11040116), 2024-04-05
Supplement: s1 [file s1]

| <b>Table S1. Baseline characteristics.</b> |                      |                       |                  |
|--------------------------------------------|----------------------|-----------------------|------------------|
| <b>Variable</b>                            | <b>Men (n = 212)</b> | <b>Women (n = 45)</b> | <b>P-value</b>   |
| Age (years)                                | 64.9 (54.8 – 72.1)   | 57.7 (47.3 – 66.9)    | <b>0.003</b>     |
| Female sex                                 |                      |                       |                  |
| Ischemic heart disease                     | 140 (66.0%)          | 12 (26.7%)            | <b>&lt;0.001</b> |
| Non-ischemic heart disease                 | 46 (21.7%)           | 22 (48.9%)            | <b>&lt;0.001</b> |
| Ventricular arrhythmia of unclear cause    | 26 (12.3%)           | 11 (24.4%)            | <b>0.035</b>     |
| Presenting ventricular arrhythmia          |                      |                       | 0.651            |
| VF                                         | 144 (67.9%)          | 29 (64.4%)            |                  |
| Sustained VT                               | 68 (32.1%)           | 16 (35.6%)            |                  |
| OHCA                                       | 151 (71.2%)          | 31 (68.9%)            | 0.754            |
| Type of ICD                                |                      |                       | <b>0.031</b>     |
| S-ICD                                      | 7 (3.3%)             | 5 (11.1%)             |                  |
| VVI-ICD                                    | 107 (50.5%)          | 14 (31.1%)            |                  |
| DDD-ICD                                    | 70 (33.0%)           | 18 (40.0%)            |                  |
| CRT-D                                      | 28 (13.2%)           | 8 (17.8%)             |                  |
| BMI (kg/m <sup>2</sup> )                   | 26.5 (24.5 – 29.2)   | 27.0 (23.9 – 34.8)    | 0.423            |
| NYHA class                                 |                      |                       | 1.000            |
| I or II                                    | 147 (69.3%)          | 28 (62.2%)            |                  |
| III or IV                                  | 25 (11.8%)           | 5 (11.1%)             |                  |
| Medical history                            |                      |                       |                  |
| Hypertension                               | 106 (50.0%)          | 18 (40.0%)            | 0.223            |
| Dyslipidemia                               | 89 (42.0%)           | 7 (15.6%)             | <b>&lt;0.001</b> |
| Myocardial infarction                      | 126 (59.4%)          | 11 (24.4%)            | <b>&lt;0.001</b> |
| DM                                         | 40 (18.9%)           | 8 (17.8%)             | 0.865            |
| Family history SCD                         | 19 (9.0%)            | 5 (11.1%)             | 0.583            |
| Syncope                                    | 18 (8.5%)            | 6 (13.3%)             | 0.394            |
| Prior heart surgery                        | 65 (30.7%)           | 1 (2.2%)              | <b>&lt;0.001</b> |
| Atrial fibrillation                        | 74 (34.9%)           | 12 (26.7%)            | 0.287            |
| Non-sustained VT                           | 40 (18.9%)           | 7 (15.6%)             | 0.602            |
| CAD                                        | 145 (68.4%)          | 12 (26.7%)            | <b>&lt;0.001</b> |
| Echocardiography                           |                      |                       |                  |
| LVEF (%)                                   | 43 (34 – 53)         | 47 (35 – 58)          | 0.129            |
| LAVI (mL/m <sup>2</sup> )                  | 37 (29 – 45)         | 34 (29 – 39)          | 0.223            |
| Maximum myocardial wall thickness (mm)     | 11.1 ± 2.1           | 10.0 ± 1.7            | <b>0.003</b>     |
| LVEDD (mm)                                 | 55.5 ± 8.4           | 53.1 ± 8.6            | 0.115            |
| LV mass (g)                                | 222 ± 64             | 172 ± 48              | <b>&lt;0.001</b> |
| RVF                                        |                      |                       | 0.878            |
| Poor                                       | 3 (1.4%)             | 0 (0.0%)              |                  |
| Mediocre                                   | 6 (2.8%)             | 0 (0.0%)              |                  |
| Reasonable                                 | 30 (14.2%)           | 6 (13.3%)             |                  |
| Good                                       | 160 (75.5%)          | 35 (77.8%)            |                  |
| Mitral insufficiency                       |                      |                       | 0.890            |
| None                                       | 125 (59.0%)          | 28 (62.2%)            |                  |
| Mild (grade 1)                             | 49 (23.1%)           | 12 (26.7%)            |                  |
| Moderate (grade 2)                         | 17 (8.0%)            | 3 (6.7%)              |                  |
| Severe (grade 3)                           | 5 (2.4%)             | 0 (0.0%)              |                  |
| LGE on CMR                                 |                      |                       | <b>0.013</b>     |
| Yes                                        | 72 (34.0%)           | 8 (17.8%)             |                  |
| No                                         | 39 (18.4%)           | 14 (31.1%)            |                  |
| Electrocardiography                        |                      |                       |                  |
| Rhythm                                     |                      |                       | <b>0.024</b>     |
| Sinus rhythm                               | 179 (84.4%)          | 42 (93.3%)            |                  |
| Atrial fibrillation                        | 27 (12.7%)           | 1 (2.2%)              |                  |
| Atrial flutter                             | 2 (0.9%)             | 0 (0.0%)              |                  |

|                                   |                   |                   |                  |
|-----------------------------------|-------------------|-------------------|------------------|
| Pacemaker                         | 1 (0.5%)          | 2 (4.4%)          |                  |
| Ventricular heart rate (bpm)      | 67 ± 14           | 71 ± 15           | 0.064            |
| PR interval (ms)                  | 169 (152 – 189)   | 165 (151 – 186)   | 0.450            |
| QRS duration (ms)                 | 109 (98 – 128)    | 106 (90 – 130)    | 0.349            |
| QRS axis (degrees)                | 30 (-15 – 65)     | 40 (-4 – 68)      | 0.337            |
| QT interval (ms)                  | 435 ± 52          | 431 ± 46          | 0.648            |
| QRS fragmentation†                | 79 (37.3%)        | 11 (24.4%)        | 0.214            |
| QRS morphology                    |                   |                   | 0.292            |
| Normal                            | 113 (53.3%)       | 27 (60.0%)        |                  |
| LBBB                              | 17 (8.0%)         | 8 (17.8%)         |                  |
| LAFB                              | 35 (16.5%)        | 3 (6.7%)          |                  |
| LPFB                              | 3 (1.4%)          | 1 (2.2%)          |                  |
| RBBB                              | 13 (6.1%)         | 1 (2.2%)          |                  |
| RBBB + LAFB                       | 9 (4.2%)          | 1 (2.2%)          |                  |
| RBBB + LPFB                       | 3 (1.4%)          | 0 (0.0%)          |                  |
| IVCD                              | 15 (7.1%)         | 3 (6.7%)          |                  |
| Pacing                            | 2 (0.9%)          | 1 (2.2%)          |                  |
| Early repolarization              | 13 (6.1%)         | 2 (4.4%)          | 1.000            |
| Laboratory values                 |                   |                   |                  |
| Hb (mmol/L)                       | 8.2 ± 1.2         | 7.9 ± 0.9         | 0.122            |
| Na <sup>+</sup> (mmol/L)          | 140 (138 – 141)   | 140 (139 – 142)   | 0.586            |
| K <sup>+</sup> (mmol/L)           | 4.2 ± 0.4         | 4.2 ± 0.4         | 0.438            |
| Creatinine (µmol/L)               | 89 (78 – 104)     | 72 (58 – 84)      | <b>&lt;0.001</b> |
| eGFR (mL/min/1.73m <sup>2</sup> ) | 76 ± 23           | 83 ± 24           | 0.101            |
| Urea (mmol/L)                     | 6.3 (5.0 – 8.1)   | 5.4 (4.3 – 6.8)   | <b>0.002</b>     |
| NT-proBNP (ng/L)                  | 737 (247 – 1,753) | 404 (166 – 1,058) | 0.062            |
| Medication at baseline            |                   |                   |                  |
| ACE-I/ARB                         | 99 (46.7%)        | 14 (31.1%)        | 0.117            |
| β-blocker                         | 106 (50.0%)       | 19 (42.2%)        | 0.606            |
| Calcium antagonist                | 39 (18.4%)        | 4 (8.9%)          | 0.166            |
| Diuretic                          | 50 (23.6%)        | 6 (13.3%)         | 0.191            |
| Statin                            | 100 (47.2%)       | 11 (24.4%)        | <b>0.012</b>     |
| MRA                               | 19 (9.0%)         | 3 (6.7%)          | 1.000            |
| Class 1 antiarrhythmic drugs      | 0 (0.0%)          | 1 (2.2%)          | 0.164            |
| Class 3 antiarrhythmic drugs      | 13 (6.1%)         | 2 (4.4%)          | 1.000            |
| Digoxin                           | 8 (3.8%)          | 1 (2.2%)          | 1.000            |

Data are given as *n* (%) in case the data is categorical, median with interquartile range (IQR) when the data is continuous and the distribution is skewed, and mean with standard deviation (SD) when the data is continuous and normally distributed. The presented numbers sometimes do not add up to a total of 100% because of missing data. The given *P*-values are a reflection of the difference between women and men. *P*-values <0.05 are presented in bold. ACE-I, angiotensin-converting enzyme inhibitor, ARB, angiotensin receptor blocker, BMI, body mass index, CAD, coronary artery disease, CMR, cardiac magnetic resonance, CRT-D, cardiac resynchronization therapy ICD, DDD-ICD, dual-chamber ICD, DM, diabetes mellitus, eGFR, estimated glomerular filtration rate, Hb, hemoglobin, ICD, implantable cardioverter-defibrillator, IVCD, intraventricular conduction delay, LAFB, left anterior fascicular block, LAVI, left atrial volume index, LBBB, left bundle branch block, LGE, late gadolinium enhancement, LPFB, left posterior fascicular block, LV, left ventricle, LVEDD, left ventricular end-diastolic diameter, LVEF, left ventricular ejection fraction, MRA, mineralocorticoid receptor antagonist, NT-proBNP, N-terminal pro-brain natriuretic peptide, NYHA, New York Heart Association, OHCA, out-of-hospital cardiac arrest, RBBB, right bundle branch block, RVF, right ventricular function, SCD, sudden cardiac death, S-ICD, subcutaneous ICD, VF, ventricular fibrillation, VT, ventricular tachycardia, VVI-ICD, single-chamber ICD.

† QRS complex could be fragmented, unfragmented or broad (>120ms).

| Table S2. Adjusted Cox regression analyses with female sex as determinant using multiple imputation. |          |
|------------------------------------------------------------------------------------------------------|----------|
|                                                                                                      | Adjusted |

| Outcomes            | HR (95% CI)                     | P-value |
|---------------------|---------------------------------|---------|
| Appropriate therapy | 0.49 (0.24 – 0.99) <sup>†</sup> | 0.047   |
| Appropriate shock   | 0.52 (0.23 – 1.18) <sup>†</sup> | 0.117   |
| Appropriate ATP     | 0.48 (0.21 – 1.08) <sup>†</sup> | 0.075   |
| All-cause mortality | 1.01 (0.40 – 2.50) <sup>‡</sup> | 0.991   |
| Inappropriate shock | 1.28 (0.33 – 4.92) <sup>§</sup> | 0.717   |

CI, confidence interval, HR, hazard ratio.

<sup>†</sup> Adjusted for age, unclear cause of ventricular arrhythmia, index ventricular arrhythmia, BMI, prior atrial fibrillation, prior non-sustained VT, prior syncope, prior myocardial infarction, eGFR, QRS fragmentation and left ventricular ejection fraction.

<sup>‡</sup> Adjusted for age, unclear cause of ventricular arrhythmia, diabetes, index ventricular arrhythmia, prior heart surgery, prior myocardial infarction, and eGFR.

<sup>§</sup> Adjusted for age, unclear cause of ventricular arrhythmia and rhythm on ECG.

**Table S3. Adjusted Cox regression analyses for the primary outcome with female sex as determinant separately for ischemic and non-ischemic heart disease.**

|                   | HR (95% CI)        | P-value |
|-------------------|--------------------|---------|
| Female sex (IHD)  | 0.55 (0.19 – 1.55) | 0.257   |
| Female sex (NIHD) | 0.08 (0.01 – 0.49) | 0.006   |

The analyses were adjusted for the same potential confounders as indicated before for the primary outcome. CI, confidence interval, HR, hazard ratio, IHD, ischemic heart disease, NIHD, non-ischemic heart disease.

**Table S4. Adjusted Cox regression analyses for the primary outcome with female sex as determinant, also showing the analysis results for the potential confounders.**

| Variables                          | HR (95% CI)        | P-value |
|------------------------------------|--------------------|---------|
| Female sex                         | 0.44 (0.20 – 0.95) | 0.036   |
| Age                                | 1.00 (0.98 – 1.02) | 0.740   |
| Unclear etiology                   | 0.37 (0.14 – 0.99) | 0.048   |
| VT as index arrhythmia             | 1.70 (1.05 – 2.74) | 0.031   |
| BMI                                | 1.03 (0.99 – 1.09) | 0.163   |
| Prior atrial fibrillation          | 0.75 (0.46 – 1.24) | 0.263   |
| Prior non-sustained VT             | 1.70 (1.02 – 2.81) | 0.040   |
| Prior syncope                      | 1.30 (0.65 – 2.61) | 0.462   |
| Prior myocardial infarction        | 1.10 (0.66 – 1.84) | 0.701   |
| eGFR                               | 0.99 (0.98 – 1.01) | 0.346   |
| QRS complex                        |                    | 0.095   |
| Fragmented                         | 1.84 (1.06 – 3.19) | 0.031   |
| QRS >120ms                         | 1.46 (0.77 – 2.76) | 0.243   |
| Left ventricular ejection fraction | 1.01 (0.99 – 1.03) | 0.396   |

BMI, body mass index, CI, confidence interval, eGFR, estimated glomerular filtration rate, HR, hazard ratio, VT, ventricular tachycardia.
